# Supplementary material for: Highly flexible and optical transparent 6F-PI/TiO2optical hybrid films with tunable refractive index and excellent thermal stability
Source: Royal Society of Chemistry journal article supplement (doi:10.1039/b916758g), 2009-11-12
Supplement: b916758g.pdf [file b916758g.pdf]

## Supporting Information

### Highly Flexible and Optical Transparent 6F-PI/TiO<sub>2</sub> Optical Hybrid Films with Tunable Refractive Index and Excellent Thermal Stability

Guey-Sheng Liou,<sup>1,\*</sup> Po-Han Lin,<sup>1</sup> Hung-Ju Yen,<sup>1</sup> Yang-Yen Yu,<sup>2</sup>

Tsung-Wei Tsai,<sup>2</sup> Wen-Chang Chen<sup>1,3</sup>

<sup>1</sup> Institute of Polymer Science and Engineering, National Taiwan University, Taipei,  
Taiwan, <sup>2</sup> Materials Engineering, Mingchi University of Technology, Taishan, Taipei,  
Taiwan, <sup>3</sup> Department of Chemical Engineering, National Taiwan University, Taipei  
10617, Taiwan

\* To whom all correspondence should be addressed. E-mail: [gслиou@ntu.edu.tw](mailto:gслиou@ntu.edu.tw)

#### List of Contents for Supplementary Material:

---

|                                                                                                                                  |             |
|----------------------------------------------------------------------------------------------------------------------------------|-------------|
| <b>Scheme S1</b> Proposed reaction for thermal conversion of hydroxy-imides to benzoxazoles.....                                 | <u>SI-2</u> |
| <b>Table S1</b> Inherent Viscosity, Molecular Weights and Solubility Behavior of Polyimide <b>6FPI</b> .....                     | <u>SI-3</u> |
| <b>Table S2</b> Color Coordinates and Cutoff Wavelength ( $\lambda_0$ ) from UV-Vis Spectra of <b>6FPI</b> Hybrid Materials..... | <u>SI-4</u> |
| <b>Fig. S1</b> FTIR spectra of the studied films (a) <b>6FPI</b> (b) <b>6TP50</b> .....                                          | <u>SI-5</u> |
| <b>Fig. S2</b> TGA thermograms of <b>6FPI</b> hybrid materials in N <sub>2</sub> .....                                           | <u>SI-6</u> |
| <b>Fig. S3</b> TGA thermograms of <b>6FPI</b> hybrid materials in air .....                                                      | <u>SI-7</u> |
| <b>Fig. S4</b> TMA curve of <b>6TP30</b> with a heating rate of 10 °C/min .....                                                  | <u>SI-8</u> |
| <b>Fig. S5</b> Variation of the extinction coefficients of the polyimide-titania hybrid films in the range of 300-800 nm.....    | <u>SI-9</u> |

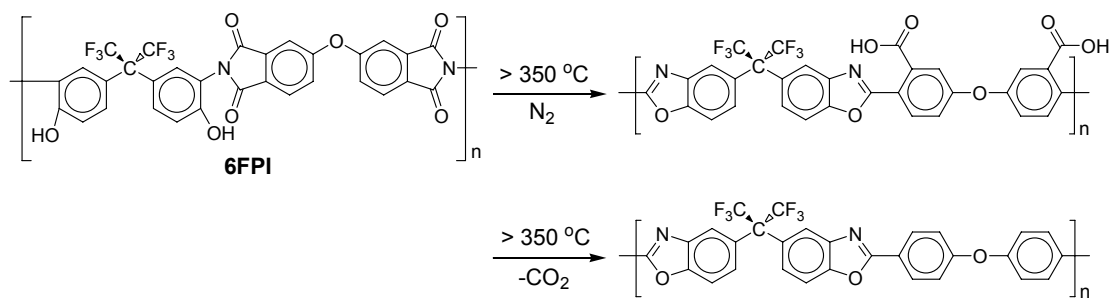

**Scheme S1** Proposed reaction for thermal conversion of hydroxy-imides to benzoxazoles.

**Table S1** Inherent Viscosity, Molecular Weights and Solubility Behavior of Polyimide **6FPI**

| polymer | $\eta_{inh}$<br>(dL/g) <sup>a</sup> | $M_w$ <sup>b</sup> | PDI <sup>c</sup> | Solubility in various Solvent <sup>d</sup> |      |     |      |                  |     |                   |
|---------|-------------------------------------|--------------------|------------------|--------------------------------------------|------|-----|------|------------------|-----|-------------------|
|         |                                     |                    |                  | NMP                                        | DMAc | DMF | DMSO | <i>m</i> -cresol | THF | CHCl <sub>3</sub> |
| 6FPI    | 0.51                                | 34500              | 1.50             | ++                                         | ++   | ++  | ++   | +                | ++  | -                 |

<sup>a</sup> Measured at a polymer concentration of 0.5 g/dL in DMAc at 30 °C. <sup>b</sup> Calibrated with polystyrene standards, using DMF as the eluent at a constant flow rate of 1 mL/min at 50 °C. <sup>c</sup> Polydispersity. <sup>d</sup> The qualitative solubility was tested with 10 mg of a sample in 1 mL of stirred solvent. (++) soluble at room temperature, (+) soluble on heating, (–) insoluble even on heating.

**Table S2** Color Coordinates and Cutoff Wavelength ( $\lambda_0$ ) from UV-Vis Spectra of **6FPI** Hybrid Materials.

| sample             | Color coordinate <sup>a</sup> |      |      | Color coordinate <sup>b</sup> |        |       | $\lambda_0$ (nm) |
|--------------------|-------------------------------|------|------|-------------------------------|--------|-------|------------------|
|                    | Y                             | x    | y    | b*                            | a*     | L*    |                  |
| 6FPI <sup>c</sup>  | 90.1                          | 0.33 | 0.36 | 14.53                         | -5.79  | 96.03 | 293              |
| 6TP10 <sup>c</sup> | 88.3                          | 0.33 | 0.38 | 21.45                         | -14.23 | 95.37 | 303              |
| 6TP30 <sup>c</sup> | 88.3                          | 0.33 | 0.39 | 24.87                         | -18.23 | 95.29 | 304              |
| 6TP50 <sup>c</sup> | 80.6                          | 0.34 | 0.40 | 29.41                         | -17.02 | 91.95 | 307              |
| 6TP70 <sup>c</sup> | 76.3                          | 0.35 | 0.42 | 37.42                         | -19.60 | 89.99 | 317              |
| 6FPI <sup>d</sup>  | 88.1                          | 0.35 | 0.37 | 21.84                         | -0.76  | 95.20 | 351              |
| 6TP10 <sup>d</sup> | 88.1                          | 0.36 | 0.39 | 31.03                         | -4.64  | 95.20 | 355              |
| 6TP30 <sup>d</sup> | 87.3                          | 0.36 | 0.41 | 37.91                         | -12.45 | 94.87 | 355              |
| 6TP50 <sup>d</sup> | 80.1                          | 0.37 | 0.44 | 49.25                         | -18.61 | 91.73 | 359              |

<sup>a</sup> The CIE Yxy color scale. <sup>b</sup> The CIE L\*a\*b\* color scale. <sup>c</sup> Hybrid thin films (thickness: 150-650 nm). <sup>d</sup> Hybrid thickness films(thickness: 20-30  $\mu$ m).

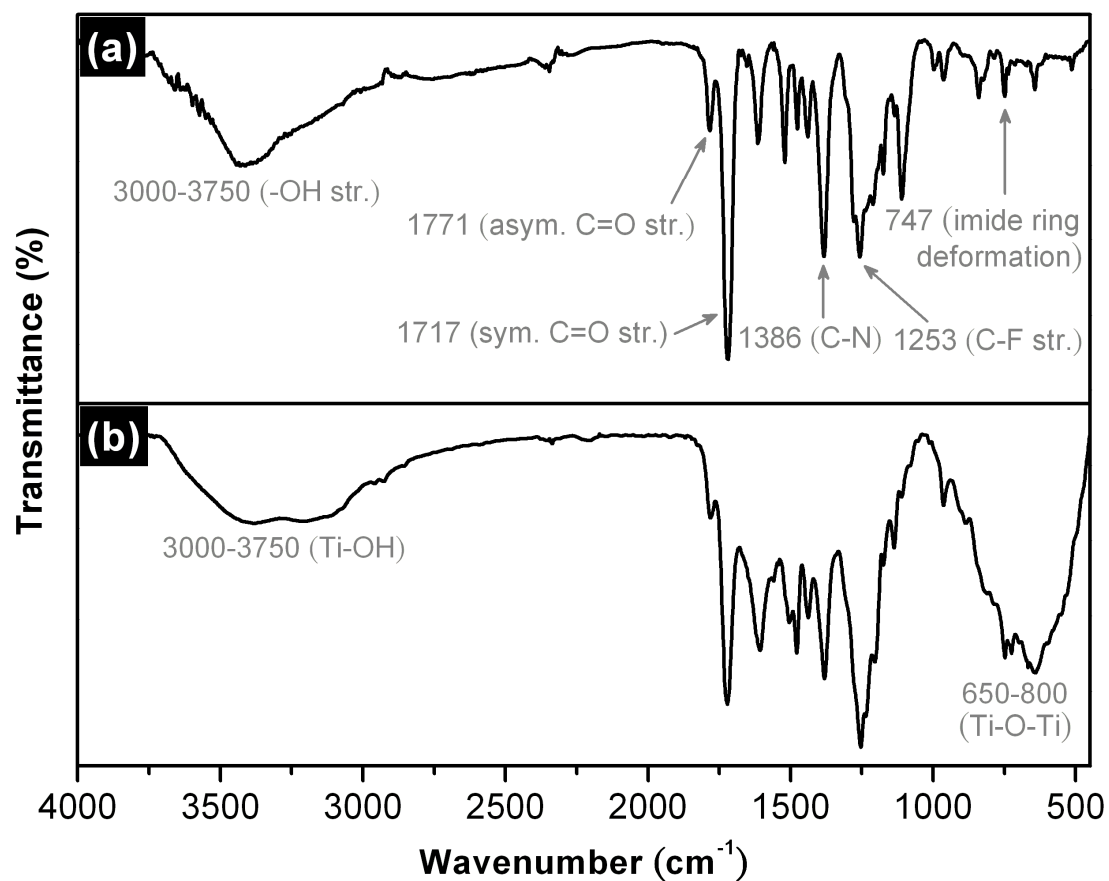

**Fig. S1** FTIR spectra of the studied films (a) **6FPI** (b) **6TP50**.

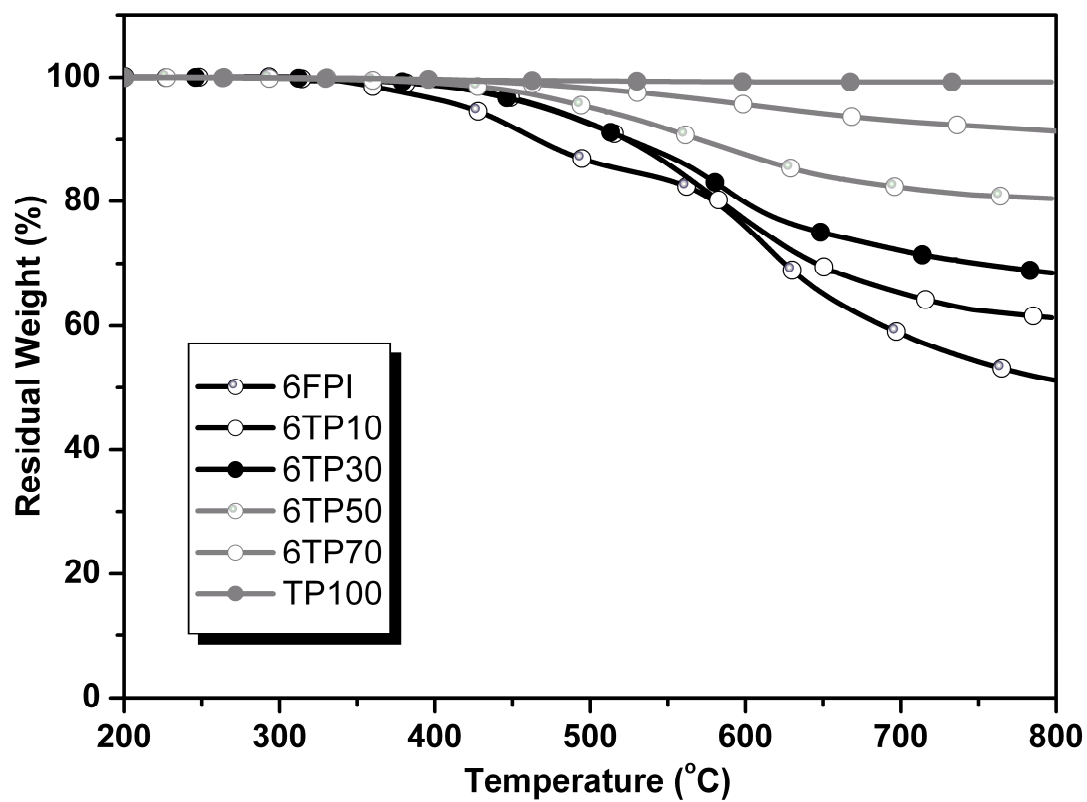

Fig. S2 TGA thermograms of 6FPI hybrid materials in N<sub>2</sub>.

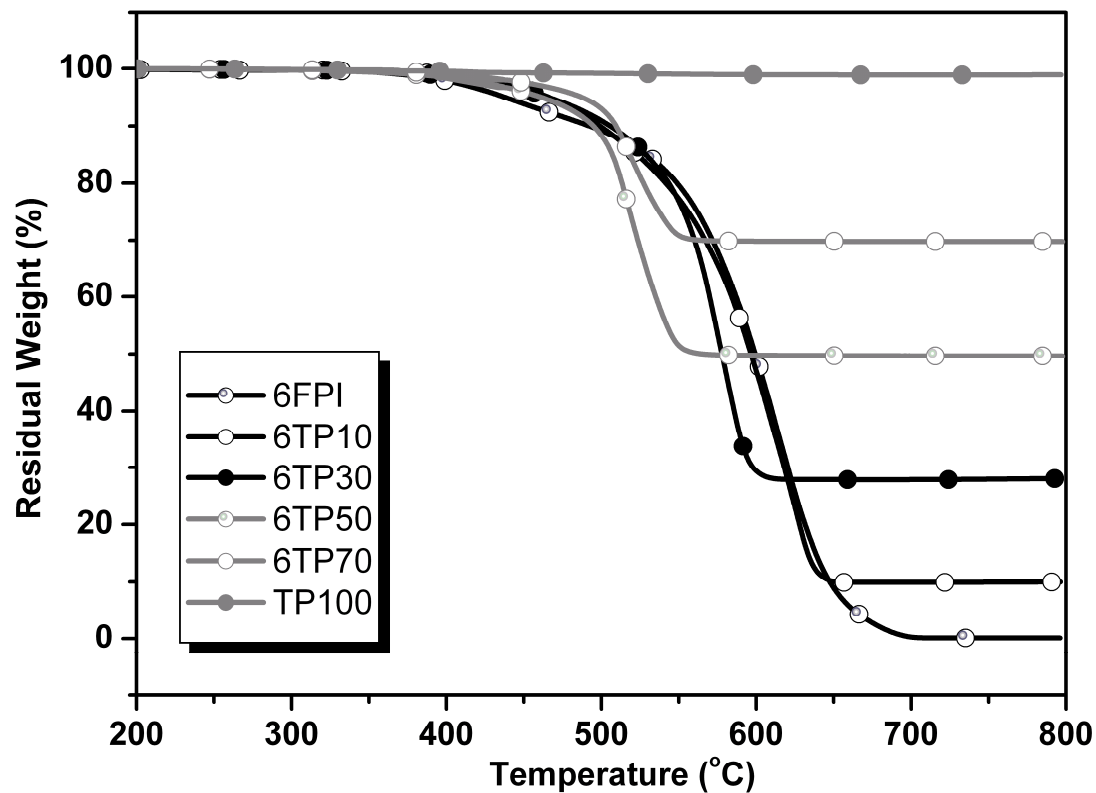

Fig. S3 TGA thermograms of 6FPI hybrid materials in air.

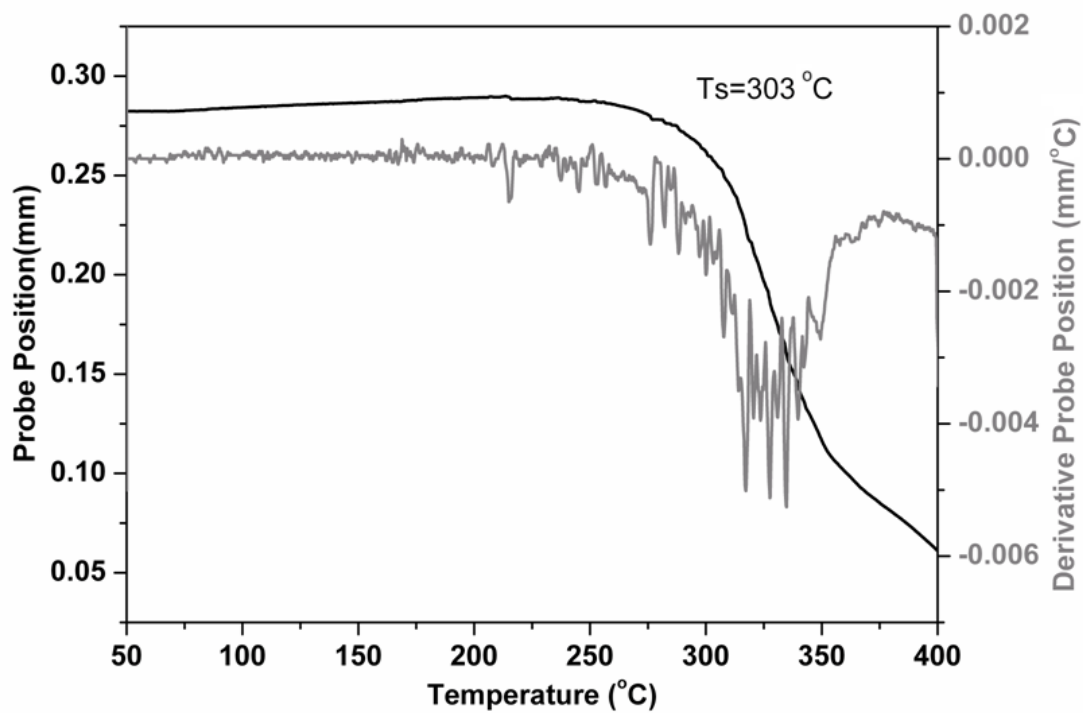

Fig. S4 TMA curve of 6TP30 with a heating rate of 10 °C/min.



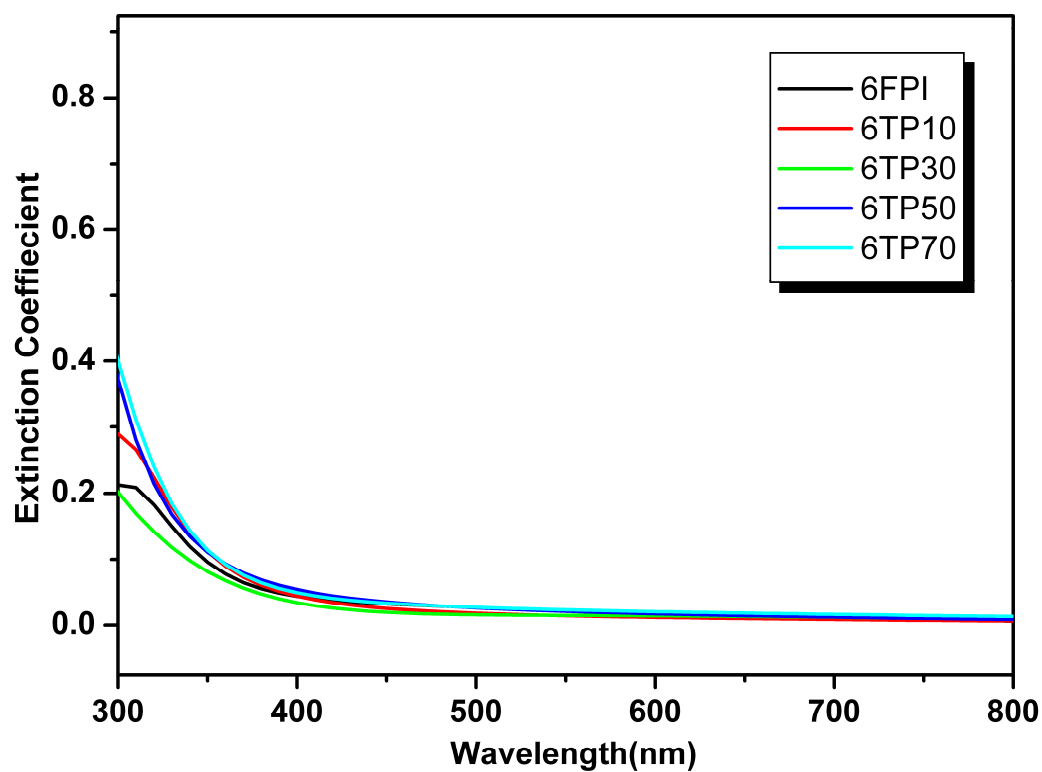

**Fig. S5** Variation of the extinction coefficients of the polyimide-titania hybrid films in the range of 300-800 nm.
